# Supplementary material for: Efficient delivery of small interfering RNA into cancer cells using dodecylated dendrimers
Source: Royal Society of Chemistry journal article supplement (doi:10.1039/c5tb01257k), 2015-01-01
Supplement: c5tb01257k1.pdf [file c5tb01257k1.pdf]

## **Electronic Supplementary Information**

### **Efficient delivery of small interfering RNA into cancer cells using dodecylated dendrimers**

Hong Chang<sup>†</sup>, Yueming Zhang<sup>†</sup>, Lei Li, Yiyun Cheng\*

Shanghai Key Laboratory of Regulatory Biology, School of Life Sciences, East China  
Normal University, Shanghai, 200241, P.R. China

<sup>†</sup>These authors contributed equally on this manuscript.

\* Correspondence author e-mail: [yycheng@mail.ustc.edu.cn](mailto:yycheng@mail.ustc.edu.cn)

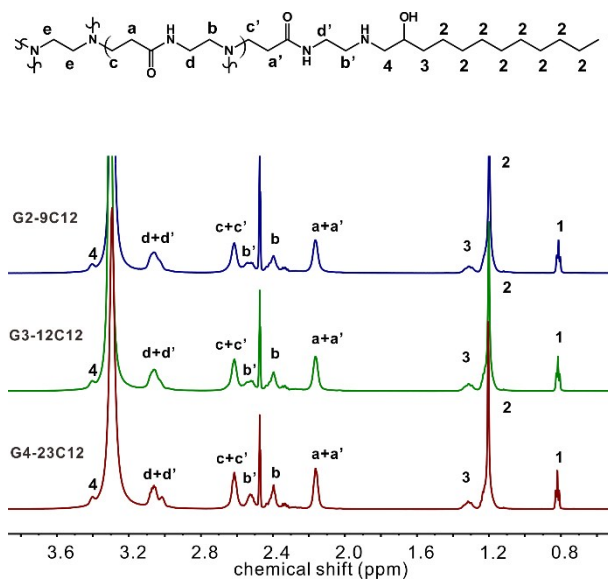

**Fig. S1.**  $^1\text{H}$  NMR spectra of G2-9C12, G3-12C12 and G4-23C12 in dimethyl sulfoxide- $\text{d}_6$ . The chemical structures of dodecylated dendrimers with proton labeling is shown above the NMR spectra.

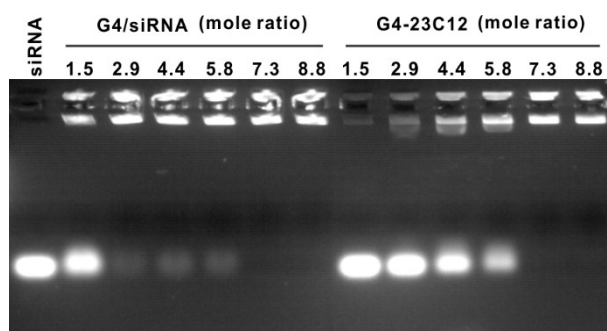

**Fig. S2.** siRNA binding capacity of G4-23C12 and unmodified G4 PAMAM dendrimer analyzed by agarose gel electrophoresis. The complexes were prepared at various dendrimer/siRNA molar ratios. G4 dendrimer shows higher siRNA binding ability than G4-23C12, which is due to decreased charge density on G4 dendrimer after dodecylation.

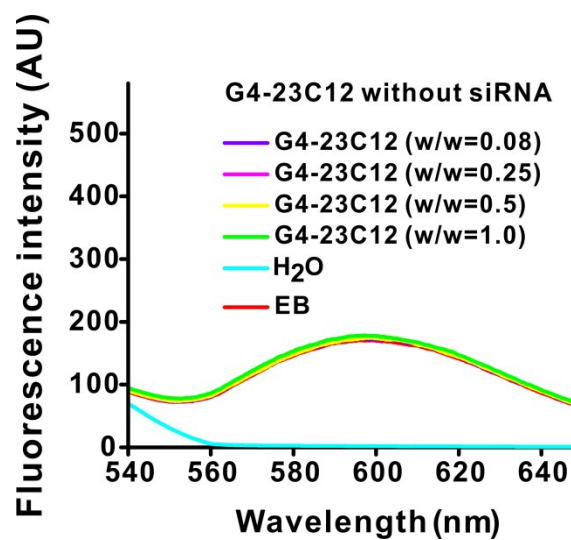

**Fig. S3.** The effect of G4-23C12 on the fluorescence intensity of EB. The addition of different amounts of G4-23C12 only slightly influences the fluorescence intensity.

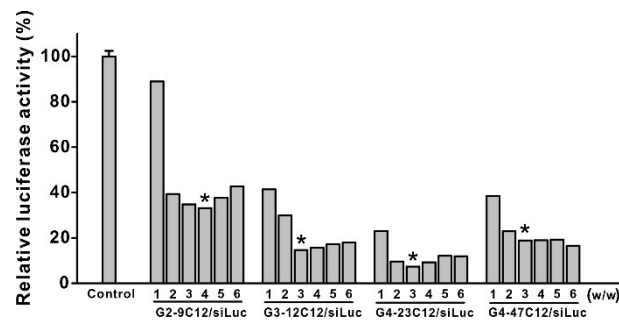

**Fig. S4.** Gene silencing efficiencies of G2-9C12, G3-12C12, G4-23C12 and G4-47C12 with 50 nM siLuc in HeLa-Luc cells at different weight ratios (w/w) after 24 h incubation. \*Represents the optimal gene silencing w/w ratio.

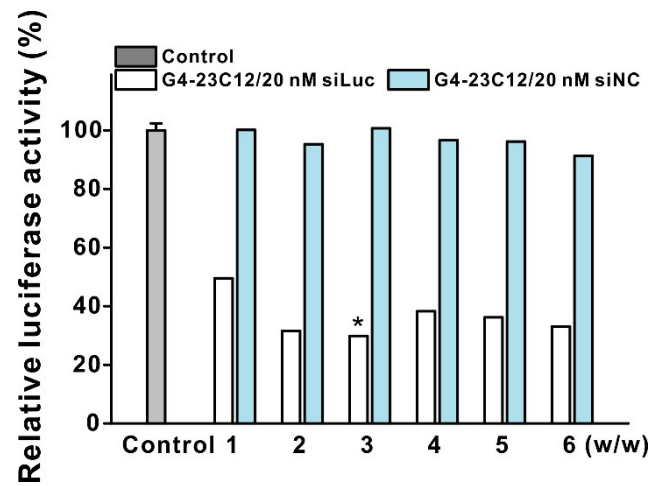

**Fig. S5.** Gene silencing efficiencies of G4-23C12 with 20 nM siLuc in HeLa-Luc cells at different weight ratios (w/w) after 24 h incubation. siNC is tested as a negative control. \*Represents the optimal gene silencing w/w ratio.

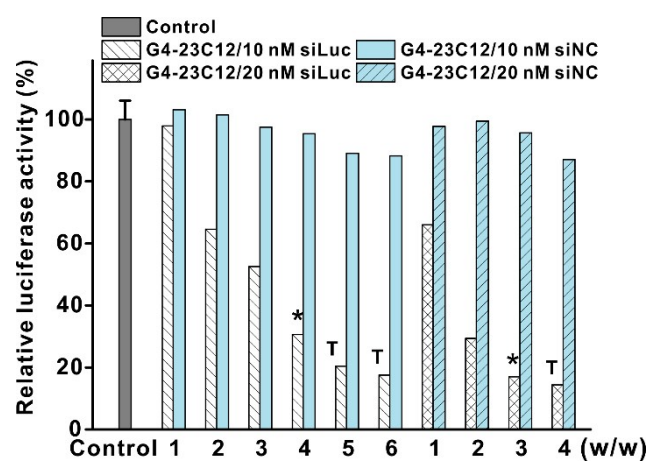

**Fig. S6.** Gene silencing efficiencies of G4-23C12 with 10 or 20 nM siLuc in MDA-MB231-Luc cells at different weight ratios (w/w) after 24 h incubation. siNC is tested as a negative control. \*Represents the optimal gene silencing w/w ratio. <sup>T</sup>Represents toxicity on the transfected cells.

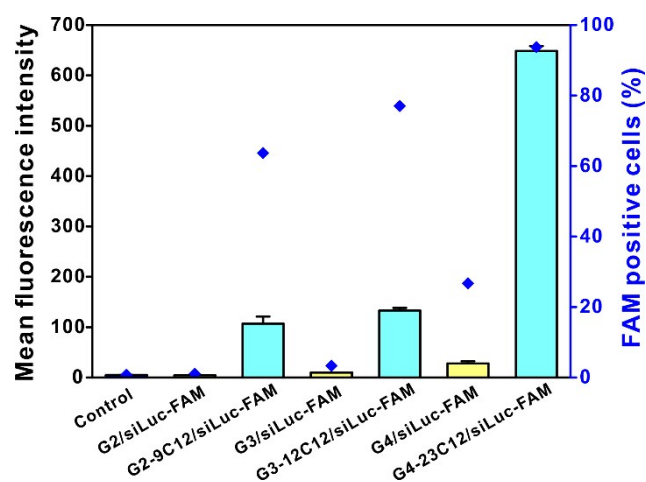

**Figure S7.** Cellular uptake efficacy of dodecylated dendrimer/siLuc complexes by HeLa-Luc cells for 4 h. Unmodified dendrimer/siLuc complexes are tested as controls. The mole ratios of G2-9C12/siLuc, G3-12C12/siLuc and G4-23C12/siLuc are 11, 4.5 and 2.2, respectively (w/w=4, 3 and 3, respectively).
